# Supplementary material
Source: PubMed Central journal article supplement (PMC2751731)
Supplement: NIHMS106509-supplement.pdf [file NIHMS106509-supplement.pdf]

# Supporting Information

## Multifunctional Inorganic Nanoparticles for Imaging, Targeting, and Drug Delivery

Monty Liong,<sup>1</sup> Jie Lu,<sup>2</sup> Michael Kovoichich,<sup>3</sup> Tian Xia,<sup>3</sup> Stefan G. Ruehm,<sup>4</sup> Andre E. Nel,<sup>3,\*</sup> Fuyuhiko Tamanoi,<sup>2,\*</sup> and Jeffrey I. Zink<sup>1,\*</sup>

<sup>1</sup>Department of Chemistry and Biochemistry

<sup>2</sup>Department of Microbiology, Immunology, and Molecular Genetics

<sup>3</sup>Department of Medicine

<sup>4</sup>Department of Radiological Sciences

University of California, Los Angeles, California, 90095

\*Email: zink@chem.ucla.edu (J.I.Z), fuyut@microbio.ucla.edu (F.T.), anel@mednet.ucla.edu (A.E.N.)

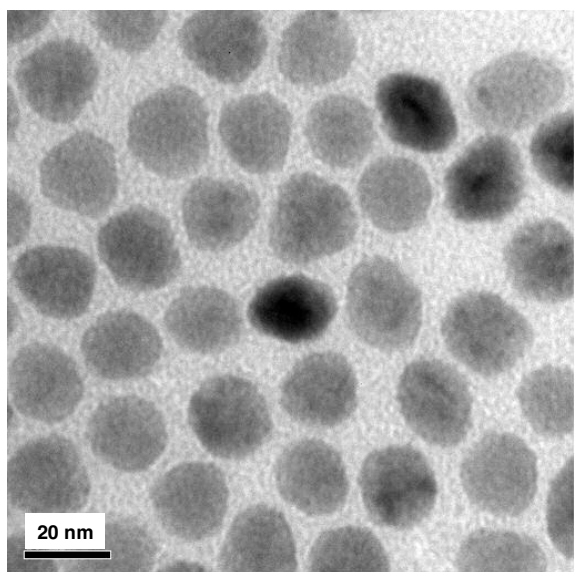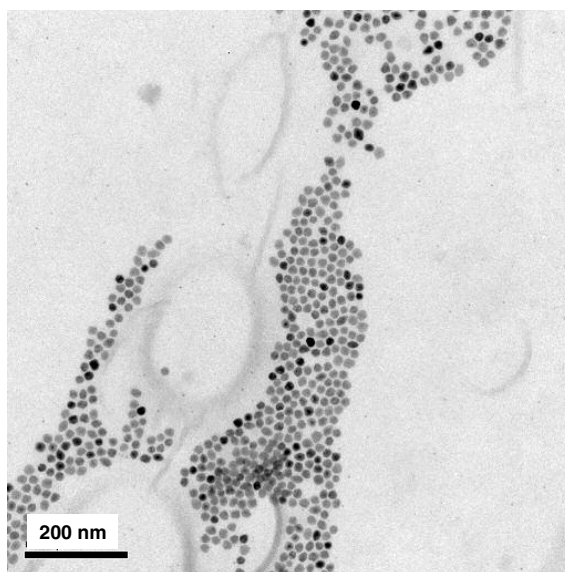

**Figure S-1.** Transmission electron microscope (TEM) images of the iron oxide nanocrystals (NCs).

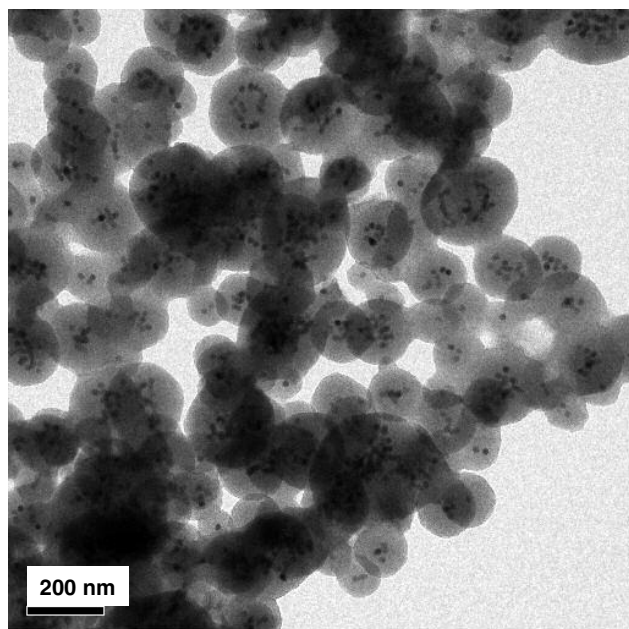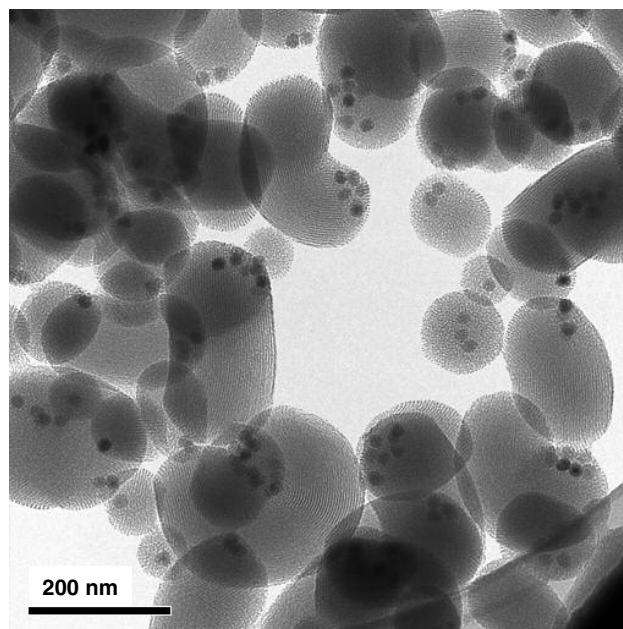

**Figure S-2.** The mesoporous silica formed large clumps of materials when the reaction temperature was set at over 80°C (left). Low temperature (below 65°C) resulted in materials which consisted of mostly structured mesoporous silica particles with the iron oxide clusters situated on the edges of the silica particles (right).

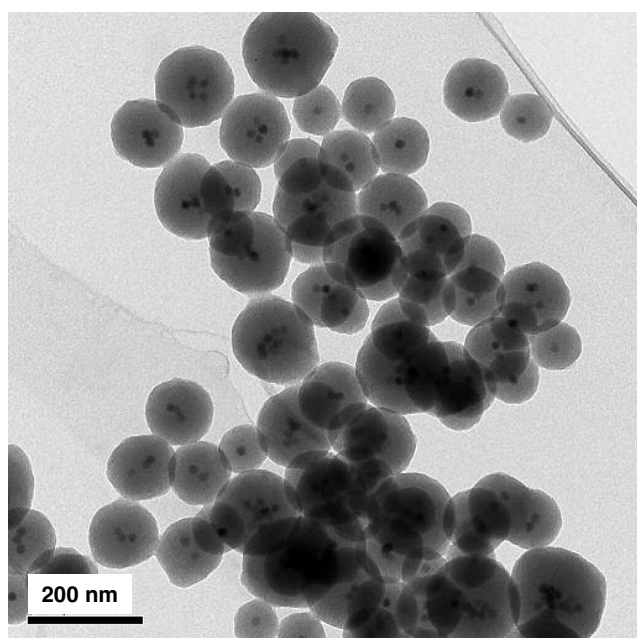

**Figure S-3.** TEM image of the iron oxide-mesoporous silica NPs at lower magnification.

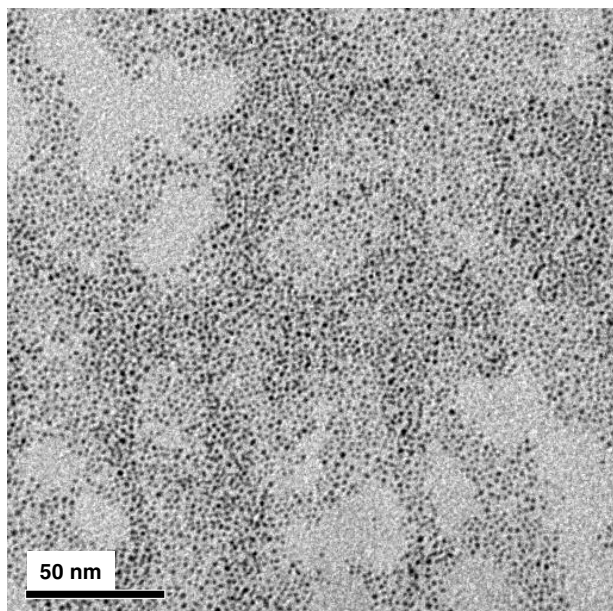

**Figure S-4.** TEM image of the as-synthesized dodecanethiol-capped gold NCs.

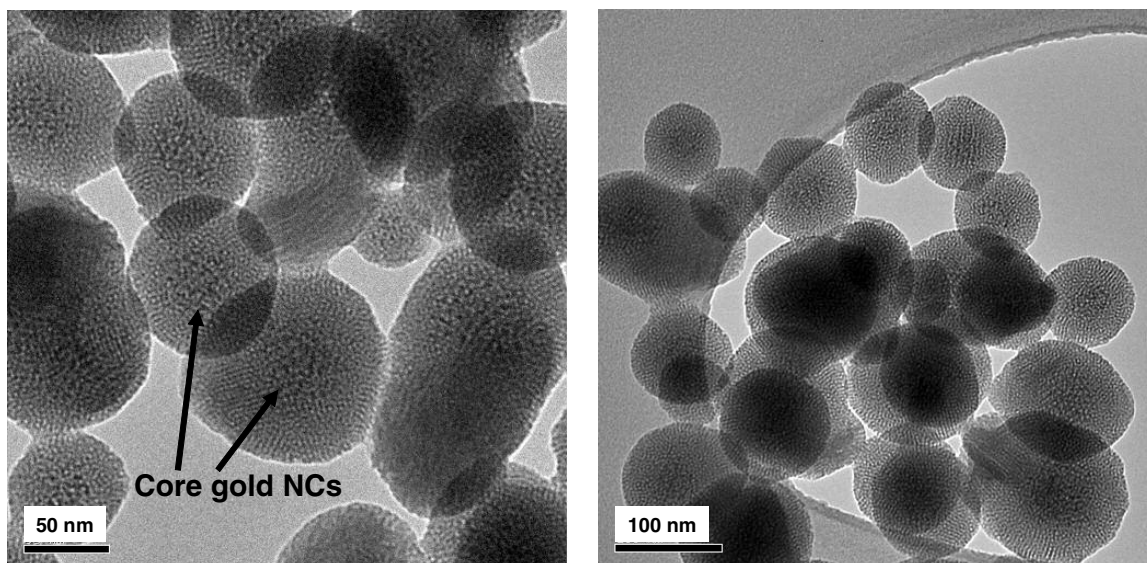

**Figure S-5.** TEM images of the gold-mesoporous silica NPs. The dark gold NCs were incorporated at the center of the NPs.

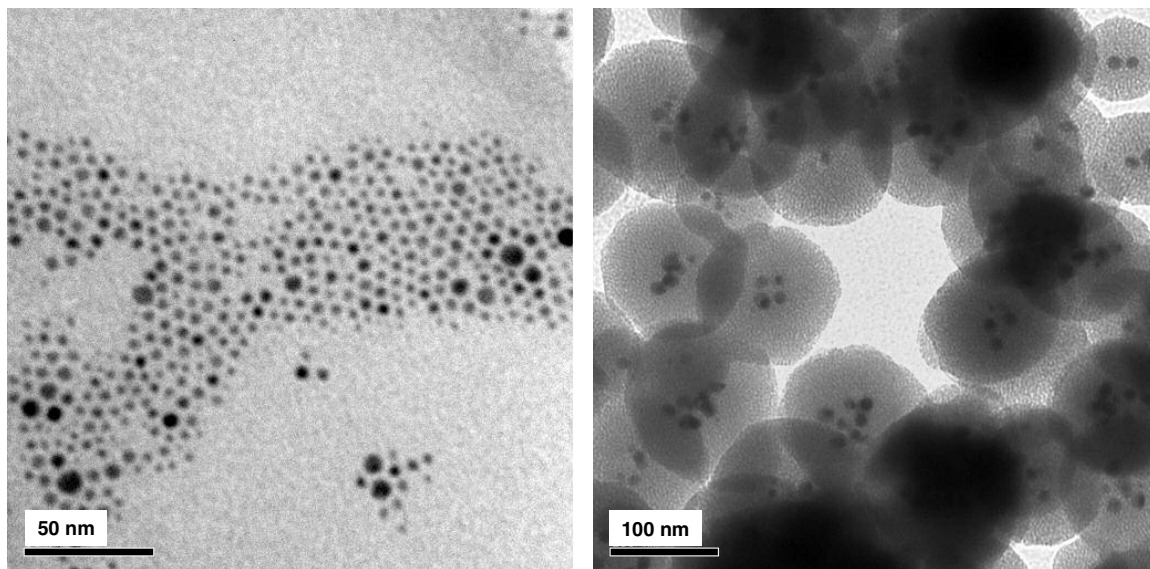

**Figure S-6.** TEM images of the as-synthesized oleylamine-capped silver NCs (left) and silver-mesoporous silica NPs.

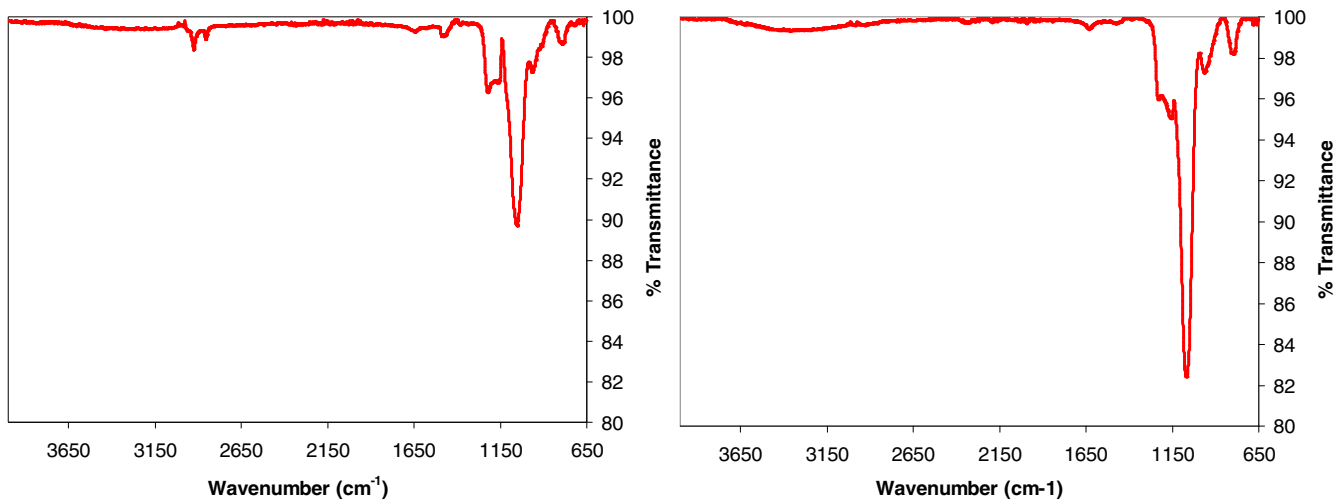

**Figure S-7.** FTIR spectra of the as-synthesized NPs (left) and after the surfactant removal process (right). The C-H stretch ( $2850\text{--}3000\text{ cm}^{-1}$ ) peaks from the CTAB surfactants disappeared after the ion-exchange procedure.

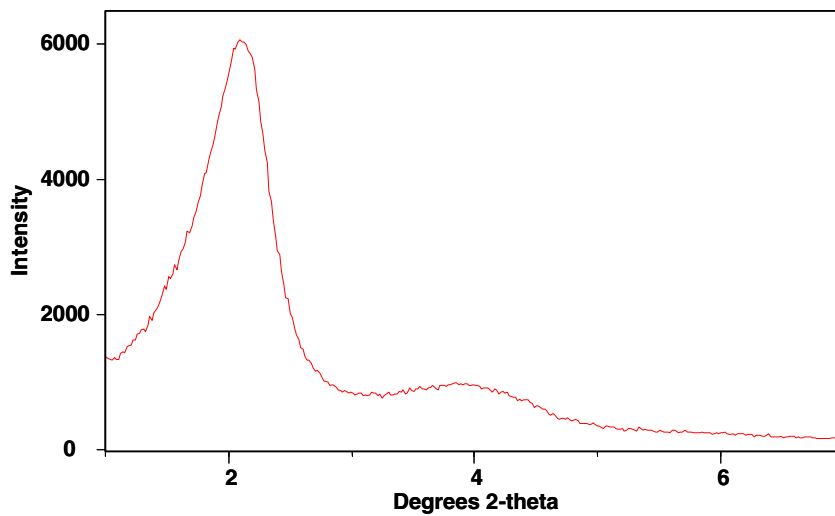

**Figure S-8.** X-ray diffraction pattern of the iron oxide-mesoporous silica NPs. An interplanar spacing of  $d(100) = 4.1\text{ nm}$  was calculated from the XRD pattern

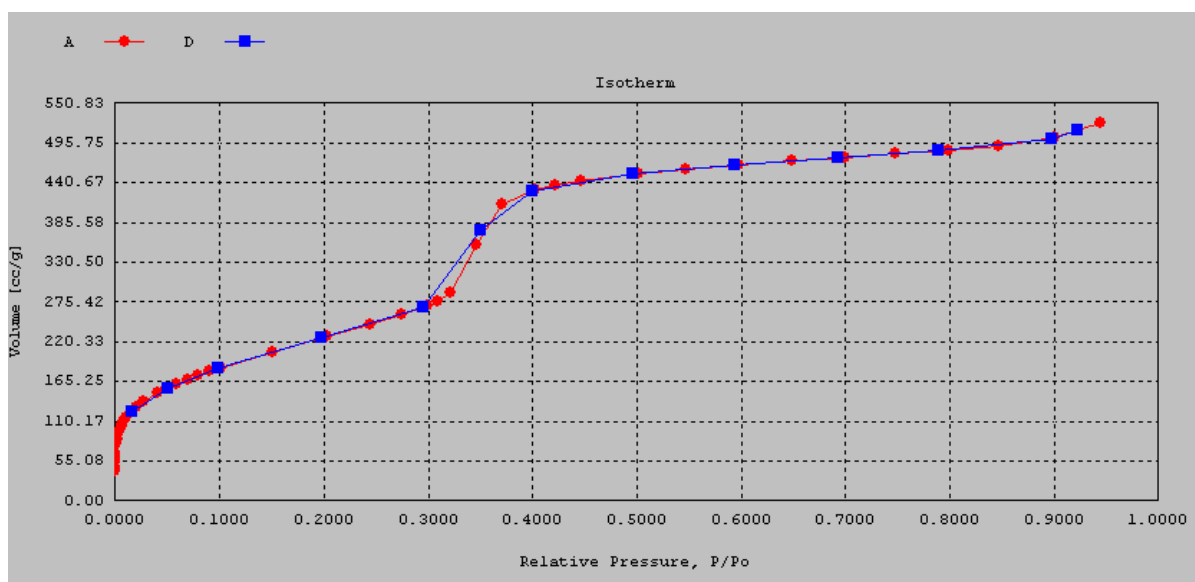

**Figure S-9.** Nitrogen adsorption-desorption isotherm of the NPs after the surfactant removal process showing the type IV isotherm that is typically observed for structured mesoporous materials.

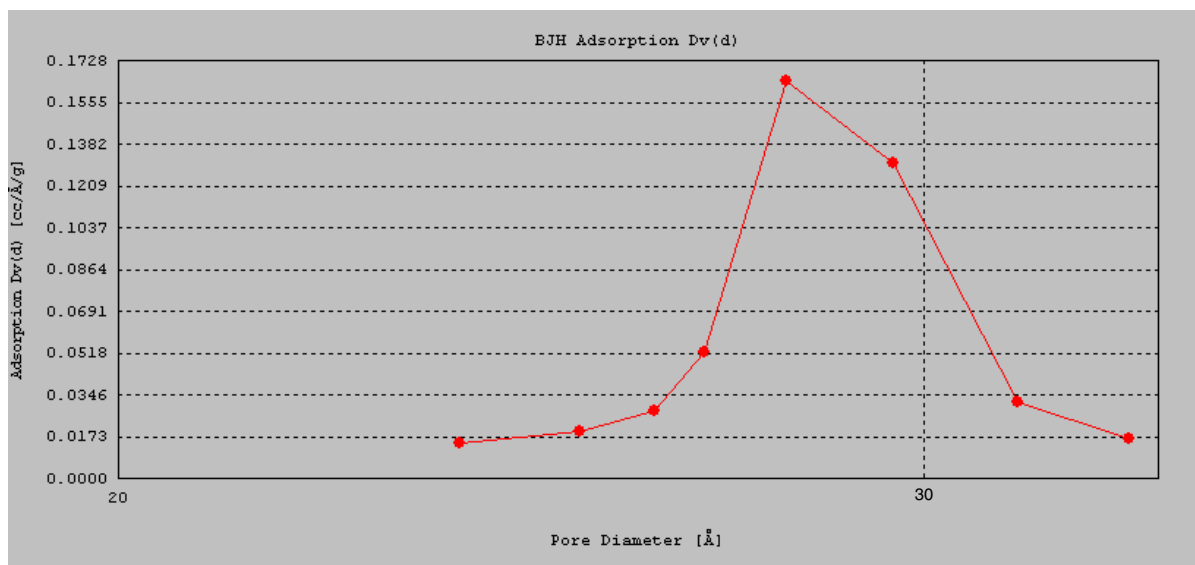

**Figure S-10.** Pore size distribution calculated by the Barret-Joyner-Halenda (BJH) method shows that the pore diameter of the NPs is approximately 2.8 nm.
